# Supplementary material
Source: MDPI journal article supplement (https://www.mdpi.com/2073-4344/7/12/379)
Supplement: s1 [file s1]

Supplementary Materials: Preparation of Ag4Bi2O5/MnO2 Corns/Cobs Like Nano Material as a Superior Catalyst for Oxygen Reduction Reaction in Alkaline Solution

Xun Zeng 1, Junqing Pan 1,* and Yanzhi Sun 2,*

**Figure S1.** CV curves of Ag4Bi2O5 with different content of MnO2, (**a**) 0%; (**b**) 10%; (**c**) 20%; (**d**) 30%; (**e**) 40%; (**f**) 50%; (**g**) 60%; (**h**) 70%.

**Figure** **S2.** Extraction of the Cdl for Ag4Bi2O5/MnO2 with different ratios of manganese dioxides.

© 2017 by the authors. Submitted for possible open access publication under the
terms and conditions of the Creative Commons Attribution (CC BY) license (http://creativecommons.org/licenses/by/4.0/).
